# Supplementary material for: The Role of Propranolol as a Repurposed Drug in Rare Vascular Diseases
Source: MDPI journal article supplement (doi:10.3390/ijms23084217), 2022-04-11
Supplement: s1 [file s1]

## ***Supplementary Materials***

**Supplementary Table S1. Propranolol in single therapy clinical trials.** Compilation of the interventional clinical trials registered at the EU Clinical Trials Register (<https://www.clinicaltrialsregister.eu>), the U.S. National Library of Medicine (<https://clinicaltrials.gov>), and the Australian New Zealand Clinical Trials Registry (<http://www.anzctr.org.au/Default.aspx>). Only interventional trials (with results or not finished), whether propranolol as single therapy has been tested, are listed.

| <b>Trial ID</b>    | <b>Study Title</b>                                                                                                                                       | <b>Status</b> | <b>Conditions</b>     | <b>Propranolol compared with</b> | <b>Outcome Measures</b>                                                                         | <b>Phase</b> | <b>N</b> | <b>Start Date</b> |
|--------------------|----------------------------------------------------------------------------------------------------------------------------------------------------------|---------------|-----------------------|----------------------------------|-------------------------------------------------------------------------------------------------|--------------|----------|-------------------|
| NCT00744185        | Propranolol in Capillary Hemangiomas                                                                                                                     | T             | Hemangioma Capillary  | placebo                          | Size and thickness variation.                                                                   | 2/3          | 14       | 2008              |
| 2008-000202-36     | Randomized clinical trial of propranolol versus placebo in the treatment of pediatric capillary hemangiomas                                              | O             | Capillary hemangiomas | placebo                          | Evolution of hemangioma thickness at one month of treatment in infants.                         | 3            | 50       | 2008              |
| NCT01211080        | Off Label Use of Propranolol for Infancy Hemangiomas                                                                                                     | C             | Hemangioma            | propranolol                      | Cosmesis of the lesion and surrounding skin.<br>Side effects.<br>Hemangioma size.               |              | 72       | 2008              |
| ACTRN1261100004965 | Propranolol for infantile haemangiomas                                                                                                                   | C             | Infantile hemangioma  | -                                | Change in volume.                                                                               | 2            | 40       | 2009              |
| NCT00967226        | Propranolol Versus Prednisolone for Treatment of Symptomatic Hemangiomas                                                                                 | T             | Hemangioma of Infancy | prednisolone                     | Size of Hemangioma.<br>Tolerability of Medication.<br>Number of Serious Adverse Events.         | 2            | 19       | 2009              |
| 2009-017241-55     | Open randomized study on propranolol vs prednisone for haemangioma in patients younger than 18 months of age                                             | S             | Hemangiomas           | propranolol<br>prednisone        | More or equal efficacy of propranolol, with less side effects than prednisone for haemangiomas. | 3            | 18       | 2009              |
| NCT01056341        | Study to Demonstrate the Efficacy and Safety of Propranolol Oral Solution in Infants With Proliferating Infantile Hemangiomas Requiring Systemic Therapy | C             | Infantile Hemangioma  | placebo                          | Complete or Nearly Complete Resolution at Week 24.                                              | 2/3          | 512      | 2010              |
| 2009-014571-49     | The use of systemic propranolol in congenital hemangiomas                                                                                                | O             | Congenital Hemangioma | -                                | Efficacy and tolerability during the first months of life.                                      | 2            | 10       | 2010              |
| 2009-018102-22     | A multicentre, open-label, repeated-dose, pharmacokinetic study of                                                                                       | C             | Infantile Hemangioma  | -                                | Pharmacokinetic assessment (rate and extent of absorption) in                                   | 1            | 18       | 2010              |

|                     |                                                                                                                                                                                                                                                                           |   |                                       |                                    |                                                                                                                                                                                 |    |     |      |
|---------------------|---------------------------------------------------------------------------------------------------------------------------------------------------------------------------------------------------------------------------------------------------------------------------|---|---------------------------------------|------------------------------------|---------------------------------------------------------------------------------------------------------------------------------------------------------------------------------|----|-----|------|
|                     | Propranolol in infants treated for proliferating infantile hemangiomas (IHs) requiring systemic therapy                                                                                                                                                                   |   |                                       |                                    | plasma concentrations.                                                                                                                                                          |    |     |      |
| 2010-019754-41      | Multicenter, prospective, single-arm phase III study of the efficacy and safety of oral therapy with propranolol (ProAngiol juice; 2 mg/kg bw/d with optional dose increase to 3 mg/kg bw/d) in infants 4 weeks to 11 months of age with severe proliferating hemangiomas | C | Hemangioma requiring systemic therapy | -                                  | Proliferation, depth and body size. Blood pressure, heart rate change and blood glucose change. Side effects.                                                                   | 3  | 60  | 2010 |
| NCT01072045         | Comparative Study of the Use of Beta Blocker and Oral Corticosteroid in the Treatment of Infantile Hemangioma                                                                                                                                                             | C | Hemangioma                            | propranolol, prednisone            | Reduction on tumor volume, based on direct measurement and photographic analysis.                                                                                               | 2  | 50  | 2010 |
| NCT01074437         | Corticosteroids With Placebo Versus Corticosteroids With Propranolol Treatment of Infantile Hemangiomas (IH)                                                                                                                                                              | T | Hemangioma                            | propranolol, prednisolone, placebo | Changes in IH Size and Vascularity. Lesion Regression.                                                                                                                          | 2  | 9   | 2010 |
| NCT04651049         | Systemic Propranolol for the Treatment of Paediatric Patients With Infantile Hemangiomas                                                                                                                                                                                  | C | Infantile Haemangiomas                | propranolol                        | Change on the height or weight of the patients.                                                                                                                                 |    | 128 | 2010 |
| 2011-003144-50      | A randomised, double blind, controlled, multicentre study in infants with infantile hemangioma to compare propranolol gel to placebo                                                                                                                                      | C | Infantile Hemangioma                  | placebo                            | Efficacy, safety profile and local tolerance.                                                                                                                                   | 2  | 80  | 2011 |
| ACTRN12612001227886 | Renin-Angiotensin System and Other Markers in Strawberry Birthmarks in infants and young children with growing problematic haemangiomas                                                                                                                                   | W | Hemangioma                            | -                                  | Serum ACE, Angiotensin II, alpha-feto protein and Renin Levels.                                                                                                                 | NA | 40  | 2012 |
| NCT01512173         | Study in Infants With Infantile Hemangioma to Compare Propranolol Gel to Placebo                                                                                                                                                                                          | C | Infantile Hemangioma                  | propranolol gel placebo            | Complete/nearly complete resolution of the Infantile Hemangioma at week 12. Persistence of efficacy 12 weeks after the end of treatment. Local tolerance of the propranolol gel | 2  | 82  | 2012 |
| NCT01743885         | Efficacy and Safety of Propranolol Versus Acebutolol on the                                                                                                                                                                                                               | T | Hemangioma                            | propanolol acebutolol              | Hemangioma size. Tolerance.                                                                                                                                                     | 3  | 55  | 2012 |

|                |                                                                                                                                |   |                      |                     |                                                                                                                                                                                                                                                                                                                                                                                                                                           |   |     |      |
|----------------|--------------------------------------------------------------------------------------------------------------------------------|---|----------------------|---------------------|-------------------------------------------------------------------------------------------------------------------------------------------------------------------------------------------------------------------------------------------------------------------------------------------------------------------------------------------------------------------------------------------------------------------------------------------|---|-----|------|
|                | Proliferative Phase of Infantile Hemangioma                                                                                    |   |                      |                     | Proportion of patients requiring treatment with corticosteroids.                                                                                                                                                                                                                                                                                                                                                                          |   |     |      |
| NCT01908972    | The Safety and Efficiency of Propranolol as an Initial Treatment for Pediatric Hemangioma                                      | C | Hemangioma           | prednisolone        | Clinical Response.<br>Percent Reduction.<br>Change in Color.<br>Size Reduction of Ulceration.<br>Reepithelization.<br>Regression.<br>Systolic Blood Pressure.<br>Glucose Levels.<br>Facial Edema.<br>Gastroesophageal Reflux.<br>Adverse Drug Reaction.                                                                                                                                                                                   | 4 | 34  | 2013 |
| NCT02342275    | Efficacy and Safety of Propranolol Versus Atenolol on the Proliferative Phase of Infantile Hemangioma                          | C | Hemangioma           | atenolol            | Color and size of IH.<br>Frequency of adverse events.<br>Cardiovascular examinations.<br>Blood glucose.<br>Neurodevelopment.<br>Quality of life.                                                                                                                                                                                                                                                                                          | 3 | 377 | 2013 |
| 2014-005555-80 | Efficacy and safety of Hemangiol solution in the treatment of high risk infantile hemangioma. A Multinational Single Arm Study | C | Infantile Hemangioma | -                   | Efficacy (6 to 12 months of age).<br>Safety (3 months after interruption).<br>Efficacy of re-administered (6 months in relapse cases).                                                                                                                                                                                                                                                                                                    | 3 | 45  | 2015 |
| NCT02505971    | Nadolol Versus Propranolol in Children With Infantile Hemangiomas                                                              | C | Infantile Hemangioma | propranolol nadolol | The change in the bulk and color of the hemangioma (IH) at Week 24 compared to baseline.<br>Percent change in IH bulk.<br>Time and dose to reach the 50%, 75% and 100% tumor shrinkage.<br>Inter-rater reliability of the VAS scores.<br>Percentage of patients achieving functional correction.<br>Percent change in the volumetric changes of hemangioma.<br>Percentage of patients with residual changes.<br>Frequency of observed and | 3 | 74  | 2015 |

# Supplementary Material

|             |                                                                                                                         |     |                      |                                 |                                                                                                                                                                                                                                                                                                                                           |    |     |      |
|-------------|-------------------------------------------------------------------------------------------------------------------------|-----|----------------------|---------------------------------|-------------------------------------------------------------------------------------------------------------------------------------------------------------------------------------------------------------------------------------------------------------------------------------------------------------------------------------------|----|-----|------|
|             |                                                                                                                         |     |                      |                                 | reported adverse events.                                                                                                                                                                                                                                                                                                                  |    |     |      |
| NCT03237637 | Comparative Study to Evaluate the Effectiveness of Atenolol and Propranolol in the Treatment of Infantile Hemangiomas   | U   | Infantile Hemangioma | propranolol<br>atenolol         | Mean difference in number of patients achieving complete clinical clearance of lesions.<br>Mean difference in number of days required to achieve complete clinical clearance of lesion.<br>Mean difference in Hemangioma Activity Score.<br>Frequency of adverse effects.<br>Mean difference in HIF-1a levels before and after treatment. | 3  | 60  | 2017 |
| NCT04105517 | Hemangiol, Post Marketing Surveillance Study                                                                            | C   | Infantile Hemangioma | -                               | Adverse events.<br>Regression.<br>Diagnosed heart diseases.                                                                                                                                                                                                                                                                               | NA | 500 | 2019 |
| NCT04288700 | Evaluation of the Efficacy of Captopril Versus Propranolol and Timolol as a Treatment of Infantile Capillary Hemangioma | R   | Infantile Hemangioma | captopril<br>timolol<br>maleate | Serum levels of VEGF, CD 133 and size of the lesion.                                                                                                                                                                                                                                                                                      | 4  | 100 | 2019 |
| NCT04684667 | 'Efficacy of Propranolol in the Treatment of Infantile Hemangioma                                                       | NYR | Infantile Hemangioma | -                               | Complete clinical clearance or volume reduction.                                                                                                                                                                                                                                                                                          | 2  | 100 | 2021 |

Phase: NA (Not Applicable). Status: C (Completed); NYR (Not yet recruiting); R (Recruiting); O (Ongoing); T (Terminated); S (Suspended); U (Unknown); W (withdrawn).
